# Supplementary material for: Regulation of the RNAPII Pool Is Integral to the DNA Damage Response
Source: PubMed Central journal article supplement (PMC7103762; doi:10.1016/j.cell.2020.02.009), 2020-03-19
Supplement: mmc4.pdf [file mmc4.pdf]

**Table S4. Oligonucleotides. Related to STAR Methods.**

| REAGENT or RESOURCE                | SOURCE                                                                                                                                                                                                 | IDENTIFIER |
|------------------------------------|--------------------------------------------------------------------------------------------------------------------------------------------------------------------------------------------------------|------------|
| <b>HDR CRISPR: gRNA sequences</b>  |                                                                                                                                                                                                        |            |
| K1268R_gRNA_F                      | CACCGCGATGAGAACAA<br>GATGCAAG                                                                                                                                                                          | N/A        |
| K1268R_gRNA_R                      | aaacCTTGCATCTTGTCT<br>CATCGC                                                                                                                                                                           | N/A        |
| K1350R_gRNA_F                      | CACCGATGCGGGTGCTG<br>AGTGAGA                                                                                                                                                                           | N/A        |
| K1350R_gRNA_R                      | aaacTCTCACTCAGCACC<br>CGCATC                                                                                                                                                                           | N/A        |
| ERCC6_ngRNA_1_REV                  | aaacCACAGCAGAGGTGG<br>ACAGCC                                                                                                                                                                           | N/A        |
| ERCC6_ngRNA_1_FWD                  | CACCGGCTGTCCACCTC<br>TGCTGTG                                                                                                                                                                           | N/A        |
| ERCC6_ngRNA_2_FWD                  | CACCGCACCCACAGAAC<br>GAAAGGAG                                                                                                                                                                          | N/A        |
| ERCC6_ngRNA_2_REV                  | aaacCTCCTTTCGTTCTGT<br>GGGTGC                                                                                                                                                                          | N/A        |
| <b>HDR CRISPR: ssDON sequences</b> |                                                                                                                                                                                                        |            |
| K1268R_ssDNA_donor                 | AATGTTGATTGCATCTTC<br>TTTTCTTTGGTCTCTAAC<br>GTGATTCATGCGTTTTAT<br>ACATGTGACACGCTGACT<br>TCTAGGACCCCCATTATC<br>TCTTGCATCCTGTTCTCA<br>TCGGAGTTCATGATGCG<br>AATACGGAGCACCAGCT<br>TCTCTGCATTGTCATCAT<br>TA | N/A        |
| K1350R_ssDNA_donor                 | GATCCACGAAAGGCAGC<br>TAGGCAGCACACACGGG<br>CTCACCGTGAAGATCTCC<br>ACAATGTCATTGGACGTG<br>GTGCGTACGGGGTCCAC<br>GTCGC&GCTCTGACAGC<br>ACCCGCATCAAGCTCAC<br>GCCGTCCGTCTCCAGGA<br>TCCAC                        | N/A        |
| <b>nascent RNA qPCR primers</b>    |                                                                                                                                                                                                        |            |
| EXT1-gene end F                    | TCAGGGTAAACAAGGGC<br>AAC                                                                                                                                                                               | N/A        |
| EXT1-gene end R                    | CATCCTGGAGGATTGTTC<br>GT                                                                                                                                                                               | N/A        |
| EXT1-TSS proximal F                | CTCAGTTCCAGGCTCAAA<br>GG                                                                                                                                                                               | N/A        |
| EXT1-TSS proximal R                | CACAAGGATTCTCGCTGT<br>GA                                                                                                                                                                               | N/A        |

|                                          |                                        |     |
|------------------------------------------|----------------------------------------|-----|
| FOS-nascent F                            | CCGGGGATAGCCTCTCT<br>TAC               | N/A |
| FOS-nascent R                            | GGGAGCCCCCTACTCAT<br>CTA               | N/A |
| LMNB1-gene body F                        | TGGCCAGATCTTGTGGTT<br>CC               | N/A |
| LMNB1-gene body R                        | GTGGAGAGCAGCATTTT<br>GGC               | N/A |
| NRIP1-TSS proximal F                     | CCTGTCCGCCTCTAAGA<br>CAC               | N/A |
| NRIP1-TSS proximal R                     | ATGAAGGTTTCCGTGGAT<br>GT               | N/A |
| PUM1-gene end F                          | AATCACTCGGCAGCCATA<br>AG               | N/A |
| PUM1-gene end R                          | CTGAAGCATTGAAGGTG<br>GTG               | N/A |
| TMSB10-nascent F                         | AGTGGGTTTGCAAGGAA<br>GAG               | N/A |
| TMSB10-nascent R                         | AATCGCCAGCTTCGATAA<br>GG               | N/A |
| ZNF644-TSS proximal F                    | AGGGGAGGGGTGTAGAC<br>AGT               | N/A |
| ZNF644-TSS proximal R                    | TAGTCACATGAAGCCGA<br>GCA               | N/A |
| <b>mature RNA qPCR primers</b>           |                                        |     |
| ATF3 F                                   | CATCCAGAACAAGCACCT<br>CTG              | N/A |
| ATF3 R                                   | TTCTCGTCGCCTCTTTTT<br>CC               | N/A |
| EGR1 F                                   | CAGCACCTTCAACCCTCA<br>G                | N/A |
| EGR1 R                                   | AGCACCTTCTCGTTGTTC<br>AG               | N/A |
| FOS F                                    | CCGGGGATAGCCTCTCT<br>TAC               | N/A |
| FOS R                                    | GTGGGAATGAAGTTGGC<br>ACT               | N/A |
| FOSB F                                   | TGTCTTCGGTGGACTCCT<br>TC               | N/A |
| FOSB R                                   | ACTGCTGTAGCCACTCAT<br>GC               | N/A |
| GAPDH F                                  | CAGCCTCAAGATCATCAG<br>CA               | N/A |
| GAPDH R                                  | TGAGTCCTTCCACGATAC<br>CA               | N/A |
| <b>Site-directed mutagenesis primers</b> |                                        |     |
| K1268R F                                 | TGATGAGAACAGGATGC<br>AAGAAG            | N/A |
| K1268R R                                 | CTGTTTTCATGATGCGAATA<br>C              | N/A |
| K(619, 627, 642)R F                      | GAGAATGGGGAGCTGAT<br>CATGGGCATCCTGTGTA | N/A |

|                     |                                                                    |     |
|---------------------|--------------------------------------------------------------------|-----|
|                     | GGAAGTCTCTGGGCACG<br>TCA                                           |     |
| K(619, 627, 642)R R | CACCACCACCCTGGTGT<br>CCCCAGGAGAGATGTGC<br>CTGTAAGGGCCACTGTC<br>TTC | N/A |
| K(710,719)R F       | GAAGTGATTGAAAGGGC<br>ACACAACAATGAGCTG                              | N/A |
| K(710,719)R R       | GATAACGTCCTGCCTGG<br>CCTTCTTAATAGTGTTT                             | N/A |
| K(751, 758, 767)R F | CCTGTCTGAATACAACAA<br>CTTCAGGTCTATGGTCGT<br>GTCCGGA                | N/A |
| K(751, 758, 767)R R | GATCTCTGAGCAGAGGA<br>GCCAGTCCTGTCTCGGG<br>CATCGTTAAG               | N/A |
| K1278R F            | GGTGGTGGACAGGATGG<br>ATGATG                                        | N/A |
| K1278R R            | TCTTCCTCTTCTTGCATC<br>TTG                                          | N/A |
